# Supplementary material
Source: HighWire-hosted journal article supplement (https://bmjopen.bmj.com/content/10/10/e034720)
Supplement: inline-supplementary-material-1 [file inline-supplementary-material-1.pdf]

## Supplementary Tables

**Table S1.** Percent availabilities and of originator brands (OBs) and lowest price generics (LPGs) of all medicines in public and private sector in 2017 and 2019 (%)

| Names of meds                     | OB<br>(Public)<br>2017 | OB<br>(Pvt.)<br>2017 | LPG<br>(Public)<br>) 2017 | LPG<br>(Pvt.)<br>2017 | OB<br>(Public<br>) 2019 | OB<br>(Pvt)<br>2019 | LPG<br>(Public<br>) 2019 | LPG<br>(pvt.)<br>2019 |
|-----------------------------------|------------------------|----------------------|---------------------------|-----------------------|-------------------------|---------------------|--------------------------|-----------------------|
| Acetylsalicylic Acid              | 0.0                    | 25.0                 | 56.3                      | 25.0                  | 18.8                    | 75.0                | 50.0                     | 18.8                  |
| Aciclovir                         | 0.0                    | 50.0                 | 25.0                      | 37.5                  | 6.3                     | 18.8                | 0.0                      | 50.0                  |
| Amiodarone                        | 7.1                    | 62.5                 | 21.4                      | 6.3                   | 0.0                     | 62.5                | 21.4                     | 0.0                   |
| Amitriptyline                     | 0.0                    | 31.3                 | 0.0                       | 25.0                  | 0.0                     | 0.0                 | 50.0                     | 50.0                  |
| Amlodipine                        | 6.3                    | 75.0                 | 62.5                      | 31.3                  | 37.5                    | 93.8                | 12.5                     | 56.3                  |
| Amoxicillin                       | 43.8                   | 93.8                 | 18.8                      | 25.0                  | 93.8                    | 68.8                | 0.0                      | 37.5                  |
| Amoxicillin (250)                 | 18.8                   | 100.0                | 12.5                      | 31.3                  | 50.0                    | 87.5                | 0.0                      | 37.5                  |
| Atenolol                          | 12.5                   | 87.5                 | 81.3                      | 43.8                  | 43.8                    | 81.3                | 0.0                      | 56.3                  |
| Atorvastatin                      | 7.1                    | 50.0                 | 21.4                      | 25.0                  | 42.9                    | 62.5                | 21.4                     | 18.8                  |
| Azithromycin                      | 0.0                    | 25.0                 | 25.0                      | 31.3                  | 31.3                    | 25.0                | 25.0                     | 75.0                  |
| Beclometasone inhaler             | 0.0                    | 6.3                  | 35.7                      | 12.5                  | 35.7                    | 43.8                | 0.0                      | 0.0                   |
| Bisoprolol                        | 6.3                    | 87.5                 | 18.8                      | 25.0                  | 37.5                    | 81.3                | 0.0                      | 56.3                  |
| Captopril                         | 0.0                    | 81.3                 | 85.7                      | 25.0                  | 50.0                    | 93.8                | 28.6                     | 50.0                  |
| Carbamazepine                     | 12.5                   | 87.5                 | 56.3                      | 25.0                  | 25.0                    | 31.3                | 0.0                      | 56.3                  |
| Ceftriaxone injection             | 14.3                   | 68.8                 | 71.4                      | 31.3                  | 21.4                    | 75.0                | 50.0                     | 87.5                  |
| Ciprofloxacin                     | 0.0                    | 81.3                 | 100.0                     | 37.5                  | 64.3                    | 93.8                | 14.3                     | 25.0                  |
| Clarithromycin                    | 0.0                    | 87.5                 | 35.7                      | 25.0                  | 50.0                    | 93.8                | 0.0                      | 56.3                  |
| Co-trimoxazole suspension         | 6.3                    | 31.3                 | 62.5                      | 6.3                   | 6.3                     | 6.3                 | 43.8                     | 6.3                   |
| Diazepam                          | 6.3                    | 62.5                 | 12.5                      | 0.0                   | 43.8                    | 68.8                | 0.0                      | 0.0                   |
| Diclofenac                        | 42.9                   | 50.0                 | 35.7                      | 6.3                   | 85.7                    | 93.8                | 0.0                      | 81.3                  |
| Digoxin                           | 21.4                   | 62.5                 | 28.6                      | 0.0                   | 28.6                    | 68.8                | 0.0                      | 56.3                  |
| Enalapril                         | 0.0                    | 68.8                 | 62.5                      | 18.8                  | 12.5                    | 68.8                | 12.5                     | 50.0                  |
| Fluconazole                       | 0.0                    | 37.5                 | 18.8                      | 25.0                  | 43.8                    | 43.8                | 0.0                      | 50.0                  |
| Fluoxetine                        | 0.0                    | 43.8                 | 12.5                      | 43.8                  | 6.3                     | 62.5                | 6.3                      | 62.5                  |
| Fluphenazine Decanoate            | 0.0                    | 0.0                  | 0.0                       | 12.5                  | 0.0                     | 0.0                 | 7.1                      | 6.3                   |
| Furosemide                        | 12.5                   | 93.8                 | 50.0                      | 6.3                   | 50.0                    | 87.5                | 0.0                      | 0.0                   |
| Glibenclamide                     | 18.8                   | 68.8                 | 56.3                      | 12.5                  | 68.8                    | 93.8                | 0.0                      | 12.5                  |
| Gliclazide                        | 0.0                    | 75.0                 | 0.0                       | 18.8                  | 7.1                     | 75.0                | 0.0                      | 31.3                  |
| Hydrochlorothiazide               | 0.0                    | 0.0                  | 0.0                       | 12.5                  | 18.8                    | 0.0                 | 0.0                      | 0.0                   |
| Indinavir                         | 0.0                    | 0.0                  | 0.0                       | 0.0                   | 0.0                     | 0.0                 | 0.0                      | 0.0                   |
| Insulin Isophane (NPH)            | 0.0                    | 75.0                 | 50.0                      | 25.0                  | 56.3                    | 68.8                | 0.0                      | 18.8                  |
| Insulin Neutral Soluble (Regular) | 0.0                    | 68.8                 | 50.0                      | 25.0                  | 68.8                    | 68.8                | 0.0                      | 18.8                  |
| Losartan                          | 7.1                    | 43.8                 | 14.3                      | 43.8                  | 0.0                     | 43.8                | 42.9                     | 43.8                  |
| Lovastatin                        | 0.0                    | 0.0                  | 6.3                       | 0.0                   | 6.3                     | 37.5                | 12.5                     | 0.0                   |

|                                       |      |      |      |      |      |       |      |      |
|---------------------------------------|------|------|------|------|------|-------|------|------|
| <b>Metformin</b>                      | 25.0 | 81.3 | 56.3 | 31.3 | 68.8 | 93.8  | 0.0  | 50.0 |
| <b>Methyldopa</b>                     | 12.5 | 81.3 | 25.0 | 0.0  | 75.0 | 68.8  | 0.0  | 0.0  |
| <b>Metronidazole</b>                  | 25.0 | 93.8 | 56.3 | 37.5 | 75.0 | 87.5  | 0.0  | 56.3 |
| <b>Nevirapine</b>                     | 0.0  | 0.0  | 14.3 | 0.0  | 0.0  | 0.0   | 0.0  | 0.0  |
| <b>Nifedipine Retard</b>              | 0.0  | 75.0 | 28.6 | 12.5 | 0.0  | 31.3  | 14.3 | 12.5 |
| <b>Omeprazole</b>                     | 6.3  | 56.3 | 75.0 | 37.5 | 62.5 | 62.5  | 6.3  | 50.0 |
| <b>Omeprazole (10)</b>                | 0.0  | 12.5 | 43.8 | 18.8 | 18.8 | 0.0   | 12.5 | 31.3 |
| <b>Paracetamol suspension</b>         | 6.3  | 68.8 | 87.5 | 25.0 | 81.3 | 87.5  | 0.0  | 81.3 |
| <b>Phenytoin</b>                      | 0.0  | 6.3  | 12.5 | 6.3  | 0.0  | 50.0  | 6.3  | 0.0  |
| <b>Propranolol</b>                    | 12.5 | 68.8 | 12.5 | 6.3  | 18.8 | 87.5  | 0.0  | 25.0 |
| <b>Pyrimethamine with sulfadoxine</b> | 0.0  | 75.0 | 21.4 | 6.3  | 21.4 | 68.8  | 0.0  | 6.3  |
| <b>Ranitidine</b>                     | 0.0  | 81.3 | 31.3 | 25.0 | 50.0 | 100.0 | 0.0  | 50.0 |
| <b>Salbutamol inhaler</b>             | 0.0  | 81.3 | 56.3 | 31.3 | 62.5 | 68.8  | 0.0  | 12.5 |
| <b>Simvastatin</b>                    | 0.0  | 25.0 | 21.4 | 56.3 | 0.0  | 37.5  | 7.1  | 25.0 |
| <b>Spirolactone</b>                   | 6.3  | 62.5 | 25.0 | 0.0  | 12.5 | 93.8  | 6.3  | 43.8 |
| <b>Zidovudine</b>                     | 0.0  | 0.0  | 0.0  | 0.0  | 0.0  | 0.0   | 0.0  | 0.0  |
| <b>Mean availabilities</b>            | 6.8  | 55.0 | 35.1 | 20.3 | 33.1 | 58.3  | 9.0  | 32.3 |

**Table (S2).** Change in availability at different levels of healthcare (Public Sector).

|                                                       | Primary level<br>(n=2 outlets) |                | Secondary level (n=13<br>outlets) |                | Tertiary level<br>(n=1 outlet) |                |
|-------------------------------------------------------|--------------------------------|----------------|-----------------------------------|----------------|--------------------------------|----------------|
|                                                       | All medicines<br>(n=50)        |                | All medicines<br>(n=50)           |                | All medicines<br>(n=50)        |                |
|                                                       | OB                             | LPG            | OB                                | LPG            | OB                             | LPG            |
| <b>Mean<br/>Availability<br/>2017<br/>(SD), %</b>     | 0.0<br>(0.0)                   | 25.8<br>(44.5) | 7.1<br>(11.2)                     | 35.2<br>(27.5) | 12.0<br>(32.8)                 | 50.0<br>(50.5) |
| <b>Mean<br/>Availability<br/>2019<br/>(SD) , %</b>    | 21.0<br>(31.0)                 | 3.2<br>(18)    | 32.3<br>(29.1)                    | 7.4<br>(13.4)  | 68.0<br>(47.1)                 | 22.0<br>(41.8) |
| <b>Change in mean<br/>percent<br/>availability, %</b> | 21.0                           | -22.6          | 25.2                              | -27.8          | 56.0                           | -28.0          |

**Table S3.** Change in median unit prices (MUPs) and median price ratios (MPRs) of the Originator Brands (OBs) at private sector.

| Sr. no. | Medicines (OB)                    | MUPs 2017 (PKR) | MPR 2017 | Adjusted MUP in 2019 | MPR 2019 | Percentage change in MUPs/MPRs |
|---------|-----------------------------------|-----------------|----------|----------------------|----------|--------------------------------|
| 1       | Acetylsalicylic Acid              | 1.16            | 0.8      | 1.12                 | 0.7      | -3.41%                         |
| 2       | Aciclovir                         | 70              | 20       | 72.5                 | 21       | 3.48%                          |
| 3       | Amiodarone                        | 17.78           | 2.2      | 17.4                 | 2.2      | -2.15%                         |
| 4       | Amlodipine                        | 11.93           | 7.3      | 12.6                 | 7.7      | 5.1%                           |
| 5       | Amoxicillin                       | 8.616           | 2.8      | 8.46                 | 2.7      | -1.83%                         |
| 6       | Amoxicillin (250)                 | 3.56            | 2.1      | 3.63                 | 2.2      | 1.83%                          |
| 7       | Atenolol                          | 6.19            | 5.6      | 6.14                 | 5.5      | -0.81%                         |
| 8       | Atorvastatin                      | 201.9           | 18       | 197                  | 18       | -2.6%                          |
| 9       | Azithromycin                      | 40              | 1.7      | 118                  | 5        | 66.2%                          |
| 10      | Beclometasone inhaler             | 1.25            | 1.2      | 1.84                 | 1.8      | 32%                            |
| 11      | Bisoprolol                        | 11.28           | 1.2      | 16.2                 | 1.7      | 30.2%                          |
| 12      | Captopril                         | 7.66            | 3        | 8.22                 | 3.2      | 6.81%                          |
| 13      | Carbamazepine                     | 4.91            | 2.6      | 4.84                 | 2.5      | -1.55%                         |
| 14      | Ceftriaxone injection             | 672             | 16       | 757                  | 18       | 11.2%                          |
| 15      | Ciprofloxacin                     | 50.4            | 13       | 50.8                 | 13       | 0.72%                          |
| 16      | Clarithromycin                    | 65.7            | 2.5      | 76.4                 | 2.9      | 14%                            |
| 17      | Co-trimoxazole suspension         | 0.29            | 0.6      | 0.44                 | 0.9      | 33.4%                          |
| 18      | Diazepam                          | 2               | 2        | 1.93                 | 1.9      | -3.41%                         |
| 19      | Diclofenac                        | 5.625           | 12       | 5.61                 | 12       | -0.29%                         |
| 20      | Digoxin                           | 2.52            | 2.4      | 2.59                 | 2.5      | 2.76%                          |
| 21      | Enalapril                         | 5.85            | 5.4      | 6                    | 5.6      | 2.43%                          |
| 22      | Fluconazole                       | 442             | 61       | 566                  | 78       | 21.9%                          |
| 23      | Fluoxetine                        | 43.42           | 9.7      | 43                   | 9.6      | -0.9%                          |
| 24      | Furosemide                        | 1.89            | 3        | 2.34                 | 3.7      | 19.2%                          |
| 25      | Glibenclamide                     | 1.69            | 2.9      | 2.09                 | 3.5      | 19.1%                          |
| 26      | Gliclazide                        | 7.6             | 1.5      | 16.4                 | 3.3      | 53.8%                          |
| 27      | Insulin Isophane (NPH)            | 64.5            | 1.1      | 73.4                 | 1.3      | 12.1%                          |
| 28      | Insulin Neutral Soluble (Regular) | 64.5            | 1.1      | 73.4                 | 1.2      | 12.1%                          |
| 29      | Losartan                          | 51.67           | 4.3      | 50.3                 | 4.2      | -2.76%                         |
| 30      | Metformin                         | 1.54            | 1        | 1.62                 | 1        | 5.21%                          |
| 31      | Methyldopa                        | 6.38            | 1.9      | 7.83                 | 2.3      | 18.5%                          |
| 32      | Metronidazole                     | 1.57            | 1.3      | 1.52                 | 1.2      | -3.41%                         |
| 33      | Nifedipine Retard                 | 5.69            | 2.7      | 5.8                  | 2.8      | 1.93%                          |
| 34      | Omeprazole                        | 49.78           | 34       | 50.6                 | 35       | 1.55%                          |
| 35      | Paracetamol suspension            | 0.85            | 1.6      | 2.2                  | 4.1      | 61.4%                          |
| 36      | Phenytoin                         | 5.2             | 4.8      | 23.2                 | 22       | 77.6%                          |
| 37      | Propranolol                       | 1.55            | 2.2      | 3.06                 | 4.3      | 49.3%                          |

|           |                                |       |     |      |     |        |
|-----------|--------------------------------|-------|-----|------|-----|--------|
| <b>38</b> | Pyrimethamine with sulfadoxine | 5.83  | 1.4 | 11.6 | 2.8 | 49.8%  |
| <b>39</b> | Ranitidine                     | 8.8   | 3.7 | 8.51 | 3.6 | -3.41% |
| <b>40</b> | Salbutamol inhaler             | 1     | 1   | 1.03 | 1.1 | 3.35%  |
| <b>41</b> | Simvastatin                    | 67.13 | 12  | 65.8 | 12  | -2.09% |
| <b>42</b> | Spiroonolactone                | 8.6   | 0.8 | 10.1 | 1   | 14.5%  |
|           | Medians                        | 6.99  | 2.5 | 8.49 | 3.2 | 4.29%  |

**Table S4.** Change in median unit prices (MUPs) and median price ratios (MPRs) of the lowest price generics (LPGs) in private sector.

| Sr. no. | Medicines                 | MUPs 2017 (PKR) | MPR 2017 | Adjusted MUP in 2019 | MPR 2019 | Percentage change in MUPs/MPRs |
|---------|---------------------------|-----------------|----------|----------------------|----------|--------------------------------|
| 1       | Acetylsalicylic Acid      | 1.015           | 0.7      | 1.06                 | 0.7      | 4.58                           |
| 2       | Aciclovir                 | 12.4            | 3.6      | 13.5                 | 3.9      | 8.41                           |
| 3       | Amitriptyline             | 1.19            | 1.4      | 1.24                 | 1.4      | 3.86                           |
| 4       | Amlodipine                | 1.8             | 1.1      | 6.29                 | 3.8      | 71.4                           |
| 5       | Amoxicillin               | 5.8             | 1.9      | 8.32                 | 2.7      | 30.3                           |
| 6       | Amoxicillin (250)         | 3               | 1.8      | 3.48                 | 2.1      | 13.8                           |
| 7       | Atenolol                  | 2.05            | 1.8      | 2.47                 | 2.2      | 16.9                           |
| 8       | Atorvastatin              | 37.5            | 3.4      | 35.8                 | 3.2      | -4.8                           |
| 9       | Azithromycin              | 40              | 1.7      | 19.3                 | 0.8      | -107                           |
| 10      | Bisoprolol                | 6.55            | 0.7      | 6.56                 | 0.7      | 0.1                            |
| 11      | Captopril                 | 6.5             | 2.5      | 6.77                 | 2.7      | 3.97                           |
| 12      | Carbamazepine             | 3.3             | 1.7      | 4.35                 | 2.3      | 24.2                           |
| 13      | Ceftriaxone injection     | 280             | 6.8      | 290                  | 7        | 3.48                           |
| 14      | Ciprofloxacin             | 11              | 2.8      | 24.2                 | 6.2      | 54.5                           |
| 15      | Clarithromycin            | 36              | 1.4      | 42.7                 | 1.6      | 15.8                           |
| 16      | Co-trimoxazole suspension | 0.21            | 0.4      | 2.32                 | 4.7      | 91                             |
| 17      | Diclofenac                | 3.5             | 7.5      | 4.79                 | 10       | 26.9                           |
| 18      | Enalapril                 | 2.05            | 1.9      | 2.84                 | 2.6      | 27.8                           |
| 19      | Fluconazole               | 145.5           | 20       | 145                  | 20       | -0.3                           |
| 20      | Fluoxetine                | 13.8            | 3.1      | 13.5                 | 3        | -1.9                           |
| 21      | Fluphenazine Decanoate    | 90.5            | 1        | 93.8                 | 1.1      | 3.5                            |
| 22      | Glibenclamide             | 1.57            | 2.7      | 1.42                 | 2.4      | -10                            |
| 23      | Gliclazide                | 4.75            | 0.9      | 5.8                  | 1.1      | 18.1                           |

|    |                                   |            |            |             |            |             |
|----|-----------------------------------|------------|------------|-------------|------------|-------------|
| 24 | Insulin Isophane (NPH)            | 48         | 0.8        | 62.3        | 1.1        | 22.9        |
| 25 | Insulin Neutral Soluble (Regular) | 48         | 0.8        | 62.3        | 1          | 22.9        |
| 26 | Losartan                          | 11         | 0.9        | 13.1        | 1.1        | 15.7        |
| 27 | Metformin                         | 1.5        | 1          | 1.86        | 1.2        | 19.2        |
| 28 | Metronidazole                     | 1.5        | 1.2        | 1.93        | 1.6        | 22.4        |
| 29 | Nifedipine Retard                 | 2.65       | 1.3        | 5.14        | 2.4        | 48.4        |
| 30 | Omeprazole                        | 15.35      | 10         | 11.4        | 7.8        | -35         |
| 31 | Omeprazole (10)                   | 12.14      | 0.9        | 5.13        | 0.4        | -137        |
| 32 | Paracetamol suspension            | 0.47       | 0.9        | 1.02        | 1.9        | 53.7        |
| 33 | Propranolol                       | 0.66       | 0.9        | 2.03        | 2.8        | 67.5        |
| 34 | Pyrimethamine with sulfadoxine    | 5          | 1.2        | 4.84        | 1.2        | -3.4        |
| 35 | Ranitidine                        | 6.93       | 2.9        | 7.78        | 3.3        | 11          |
| 36 | Salbutamol inhaler                | 0.64       | 0.7        | 0.68        | 0.7        | 5.45        |
| 37 | Simvastatin                       | 8.5        | 1.6        | 16.6        | 3          | 48.7        |
|    | <b>Medians</b>                    | <b>5.8</b> | <b>1.4</b> | <b>6.29</b> | <b>2.3</b> | <b>15.7</b> |

**Table S5.** Affordability of originator brands (OBs) for different diseases in 2017 and 2019, in private sector.

| Disease                        | Medicine           | Strength    | Dosage form | No. of units needed per treatment | Duration of treatment | MTP 2017 (PKR) | NDWs 2017 | MTP 2019 (PKR) | NDWs 2019 |
|--------------------------------|--------------------|-------------|-------------|-----------------------------------|-----------------------|----------------|-----------|----------------|-----------|
| <b>ASTHMA</b>                  | Salbutamol Inhaler | 100mcg/dose | Inhaler     | 200                               | As needed             | 200            | 0.4       | 214            | 0.4       |
|                                | Beclomethasone     | 50mcg/dose  | inhaler     | 200                               | As needed             | 250            | 0.5       | 380            | 0.8       |
| <b>Cardiovascular Diseases</b> | Bisoprolol         | 5mg         | tab         | 60                                | 30                    | 676.8          | 1.5       | 1003           | 2         |
|                                | Atenolol           | 50mg        | tab         | 30                                | 30                    | 185.7          | 0.4       | 190.5          | 0.4       |
|                                | Captopril          | 25mg        | tab         | 60                                | 30                    | 459.6          | 1         | 510            | 1         |
|                                | Amlodipine         | 5mg         | tab         | 60                                | 30                    | 715.8          | 1.5       | 780            | 1.6       |
|                                | Amiodarone         | 200mg       | tab         | 60                                | 30                    | 1066.8         | 2.3       | 1080           | 2.2       |
|                                | Losartan           | 50mg        | tab         | 60                                | 30                    | 3100.2         | 6.6       | 3120           | 6.2       |
|                                | methyl dopa        | 250mg       | tab         | 90                                | 30                    | 574.2          | 1.2       | 729            | 1.5       |
|                                | Nifedipine retard  | 20mg        | tab         | 90                                | 30                    | 512.1          | 1.1       | 540            | 1.1       |

|                                                     |                                   |          |         |     |    |        |     |       |     |
|-----------------------------------------------------|-----------------------------------|----------|---------|-----|----|--------|-----|-------|-----|
|                                                     | Spironolactone                    | 100mg    | tab     | 30  | 30 | 258    | 0.5 | 312   | 0.6 |
|                                                     | Propranolol                       | 40mg     | tab     | 90  | 30 | 139.5  | 0.3 | 284.4 | 0.6 |
|                                                     | Acetylsalicylic acid              | 75mg     | tab     | 30  | 30 | 34.8   | 0.1 | 34.8  | 0.1 |
| <b>Anti hyperlipidemics</b>                         | Simvastatin                       | 20mg     | Cap/tab | 30  | 30 | 2013.9 | 4.3 | 2040  | 4.1 |
|                                                     | Atorvastatin                      | 20mg     | Cap/tab | 30  | 30 | 6057   | 13  | 6105  | 12  |
| <b>Infections-Adult respiratory tract infection</b> | Ceftriaxone Injection             | 1g/vial  | Inj.    | 1   | 1  | 672    | 1.4 | 783   | 1.6 |
|                                                     | Ciprofloxacin                     | 500mg    | tab     | 14  | 7  | 705.6  | 1.5 | 735   | 1.5 |
|                                                     | Azithromycin                      | 500mg    | tab     | 3   | 3  | 120    | 0.3 | 367   | 0.7 |
|                                                     | clarithromycin                    | 500mg    | tab     | 28  | 14 | 1839.6 | 3.9 | 2212  | 4.4 |
|                                                     | Amoxicillin                       | 500mg    | cap     | 42  | 14 | 361.87 | 0.8 | 367.5 | 0.7 |
|                                                     | Amoxicillin                       | 250mg    | cap     | 84  | 14 | 299.04 | 0.6 | 315   | 0.6 |
| <b>Fungal Infection</b>                             | Fluconazole                       | 200mg    | cap     | 1   | 1  | 442    | 0.9 | 585   | 1.2 |
| <b>Viral Infection</b>                              | aciclovir                         | 200mg    | tab     | 25  | 5  | 1750   | 3.8 | 1875  | 3.8 |
| <b>Amoebiasis</b>                                   | metronidazole                     | 400mg    | tab     | 21  | 7  | 32.97  | 0.1 | 32.97 | 0.1 |
| <b>CNS Drugs-Anti epileptics</b>                    | Carbamezipine                     | 200mg    | tab     | 60  | 30 | 294.6  | 0.6 | 300   | 0.6 |
|                                                     | Phenytoin                         | 100mg    | tab     | 90  | 30 | 468    | 1   | 2160  | 4.3 |
| <b>Anxiety</b>                                      | diazepam                          | 5mg      | tab     | 90  | 30 | 180    | 0.4 | 180   | 0.4 |
| <b>Anti Diabetics</b>                               | Metformin                         | 500mg    | tab     | 90  | 30 | 138.6  | 0.3 | 151.2 | 0.3 |
|                                                     | Glibenclamide                     | 5mg      | tab     | 90  | 30 | 152    | 0.3 | 194.4 | 0.4 |
|                                                     | Gliclazide                        | 80mg     | tab     | 60  | 30 | 456    | 1.5 | 1020  | 2   |
|                                                     | Insulin Isophane (NPH)            | 100IU/ml | vial    | 10  | 30 | 645    | 1.4 | 758.8 | 1.5 |
|                                                     | Insulin Neutral Soluble (Regular) | 100IU/ml | vial    | 10  | 30 | 645    | 1.4 | 758.8 | 1.5 |
| <b>Ulcer Treatment</b>                              | Omeprazole                        | 20mg     | cap     | 30  | 30 | 1493.4 | 3.2 | 1569  | 3.1 |
|                                                     | ranitidine                        | 150mg    | tab     | 120 | 30 | 1056   | 2.3 | 1056  | 2.1 |
| <b>Pain/Inflammation</b>                            | Paracetamol                       | 24mg/ml  | susp    | 45  | 3  | 38.25  | 0.1 | 102.6 | 0.2 |
| <b>Arthritis</b>                                    | Diclofenac                        | 50mg     | tab     | 90  | 30 | 506.25 | 1.1 | 522   | 1   |

Where, MTP: Median treatment price, NDWs: Number of days' wages

**Table S6.** Affordability of lowest price generics (LPGs) for different diseases in 2017 and 2019, in private sector.

| Disease/Condition                            | Medicine              | Strength    | Dosage form | No. of units needed per treatment | Duration of treatment | MTP 2017 (PKR) | NDWs 2017 | MTP 2019 (PKR) | NDWs 2019 |
|----------------------------------------------|-----------------------|-------------|-------------|-----------------------------------|-----------------------|----------------|-----------|----------------|-----------|
| ASTHMA                                       | Salbutamol Inhaler    | 100mcg/dose | Inhaler     | 200                               | As needed             | 128            | 0.3       | 140            | 0.3       |
| Cardiovascular Diseases/ Anti Hypertensives  | Bisoprolol            | 5mg         | tab         | 60                                | 30                    | 393            | 0.8       | 406.8          | 0.8       |
|                                              | Atenolol              | 50mg        | tab         | 30                                | 30                    | 61.5           | 0.1       | 76.5           | 0.2       |
|                                              | Captopril             | 25mg        | tab         | 60                                | 30                    | 390            | 0.8       | 420            | 0.8       |
|                                              | Amlodipine            | 5mg         | tab         | 60                                | 30                    | 108            | 0.2       | 390            | 0.8       |
|                                              | Losartan              | 50mg        | tab         | 60                                | 30                    | 660            | 1.4       | 810            | 1.6       |
|                                              | Nifedipine retard     | 20mg        | tab         | 90                                | 30                    | 238.5          | 0.5       | 478.4          | 1         |
|                                              | Propranolol           | 40mg        | tab         | 90                                | 30                    | 59.4           | 0.1       | 189            | 0.4       |
| Anti hyperlipidemics                         | Acetylsalicylic acid  | 75mg        | tab         | 30                                | 30                    | 30.45          | 0.1       | 33             | 0.1       |
|                                              | Simvastatin           | 20mg        | Cap/tab     | 30                                | 30                    | 255            | 0.5       | 513.8          | 1         |
| Infections-Adult respiratory tract infection | Atorvastatin          | 20mg        | Cap/tab     | 30                                | 30                    | 1125           | 2.4       | 1110           | 2.2       |
|                                              | Ceftriaxone Injection | 1g/vial     | Inj.        | 1                                 | 1                     | 280            | 0.6       | 300            | 0.6       |
|                                              | Ciprofloxacin         | 500mg       | tab         | 14                                | 7                     | 154            | 0.3       | 350            | 0.7       |
|                                              | Azithromycin          | 500mg       | tab         | 3                                 | 3                     | 120            | 0.3       | 60             | 0.1       |
|                                              | clarithromycin        | 500mg       | tab         | 28                                | 14                    | 1008           | 2.2       | 1238           | 2.5       |
| Fungal Infection                             | Amoxicillin           | 500mg       | cap         | 42                                | 14                    | 243.6          | 0.5       | 361.2          | 0.7       |
|                                              | Amoxicillin           | 250mg       | cap         | 84                                | 14                    | 252            | 0.5       | 302.4          | 0.6       |
| Viral Infection                              | Fluconazole           | 200mg       | cap         | 1                                 | 1                     | 145.5          | 0.3       | 150            | 0.3       |
| Amoebiasis                                   | aciclovir             | 200mg       | tab         | 25                                | 5                     | 310            | 0.7       | 350            | 0.7       |
| CNS Drugs-Anti epileptics                    | metronidazole         | 400mg       | tab         | 21                                | 7                     | 31.5           | 0.1       | 42             | 0.1       |
|                                              | Carbamezipine         | 200mg       | tab         | 60                                | 30                    | 198            | 0.4       | 270            | 0.5       |
| Depression                                   | Amitriptyline         | 25mg        | tab         | 60                                | 30                    | 71.4           | 0.2       | 76.8           | 0.2       |

|                   |                                   |            |      |     |    |       |       |       |       |
|-------------------|-----------------------------------|------------|------|-----|----|-------|-------|-------|-------|
| Anti Diabetics    | Metformin                         | 500mg      | tab  | 90  | 30 | 135   | 0.3   | 180   | 0.4   |
|                   | Glibenclamide                     | 5mg        | tab  | 90  | 30 | 141   | 0     | 132.3 | 0.3   |
|                   | Gliclazide                        | 80mg       | tab  | 60  | 30 | 285   | 0.8   | 360   | 0.7   |
|                   | Insulin Isophane (NPH)            | 100IU/ml   | vial | 10  | 30 | 480   | 1     | 644   | 1.3   |
|                   | Insulin Neutral Soluble (Regular) | 100IU/ml   | vial | 10  | 30 | 480   | 1     | 644   | 1.3   |
|                   | Ulcer Treatment                   | Omeprazole | 20mg | cap | 30 | 30    | 460.5 | 1     | 353.7 |
| ranitidine        |                                   | 150mg      | tab  | 120 | 30 | 831.6 | 1.8   | 966   | 1.9   |
| Pain/Inflammation | Paracetamol                       | 24mg/ml    | susp | 45  | 3  | 21.15 | 0     | 47.25 | 0.1   |
| Arthritis         | Diclofenac                        | 50mg       | tab  | 90  | 30 | 315   | 0.7   | 445.5 | 0.9   |
